# Supplementary material for: β3-Adrenoreceptors Control Mitochondrial Dormancy in Melanoma and Embryonic Stem Cells
Source: Oxid Med Cell Longev. 2018 Nov 13;2018:6816508. doi: 10.1155/2018/6816508 (PMC6258109; doi:10.1155/2018/6816508)
Supplement: Supplementary Materials — Supplementary Figures: (1) metabolic assay of propranolol treatment; (2) metabolic assay with dose/response of genipin; (3) bioinformatic analysis of β3-AR presence prediction in different cell compartments. [file 6816508.f1.pdf]

## Supplementary Fig.1

### A375 melanospheres

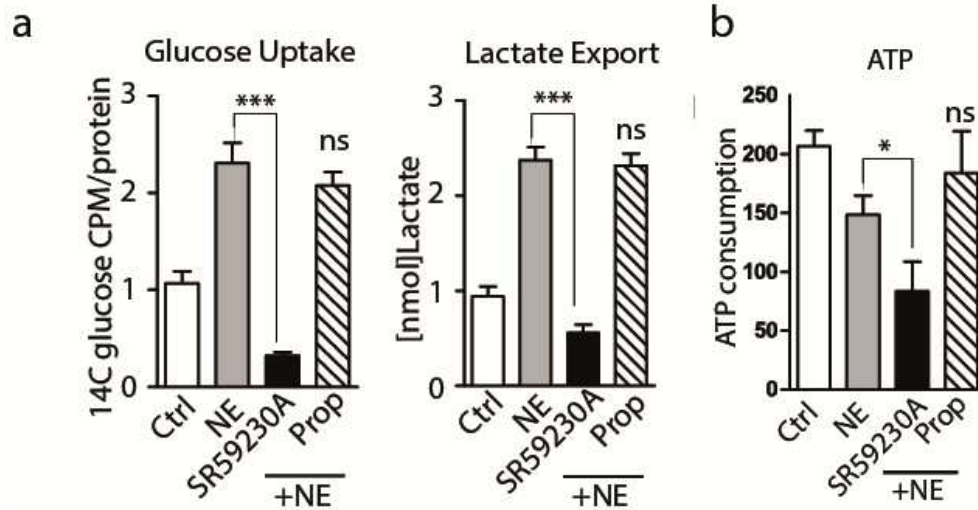

### Supplementary Figure 1

Glucose uptake and Lactate export Assays (a) and ATP production Assay (b) in A375 Melanospheres treated with Norepinephrine (10 $\mu$ M), Norepinephrine (10 $\mu$ M) + Propranolol (10 $\mu$ M), Norepinephrine (10 $\mu$ M) + SR59230A (10 $\mu$ M). \*P<0.05, \*\*\*P<0.001.

Supplementary Fig.2

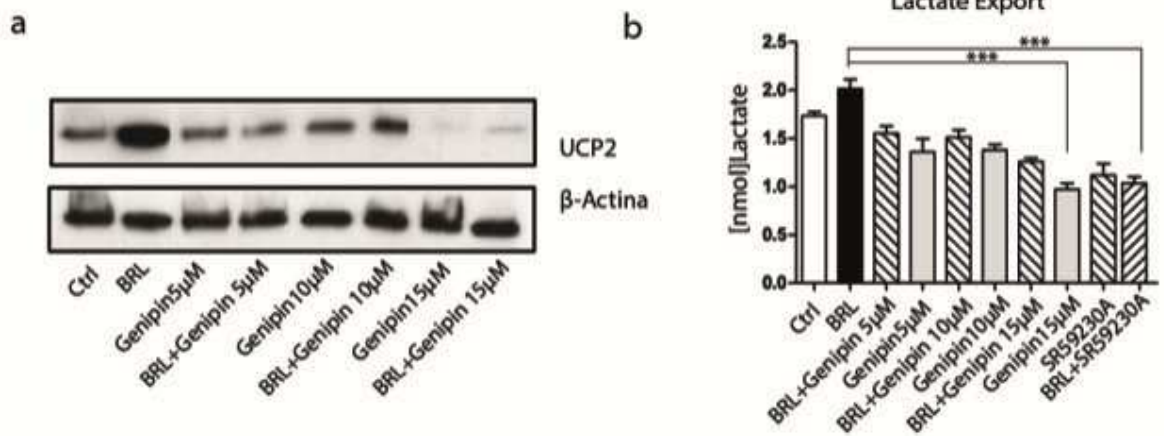

Supplementary Figure 2

WB analysis of UCP2 (a) and Lactate export Assay at different concentration of Genipin (b) in A375 Melanospheres treated with BRL37344 (10 $\mu$ M), BRL37344 (10 $\mu$ M) + different concentration of Genipin (5,10,15 $\mu$ M) and SR59230A at 10 $\mu$ M. \*\*\*P<0.001.

Supplementary Fig.3

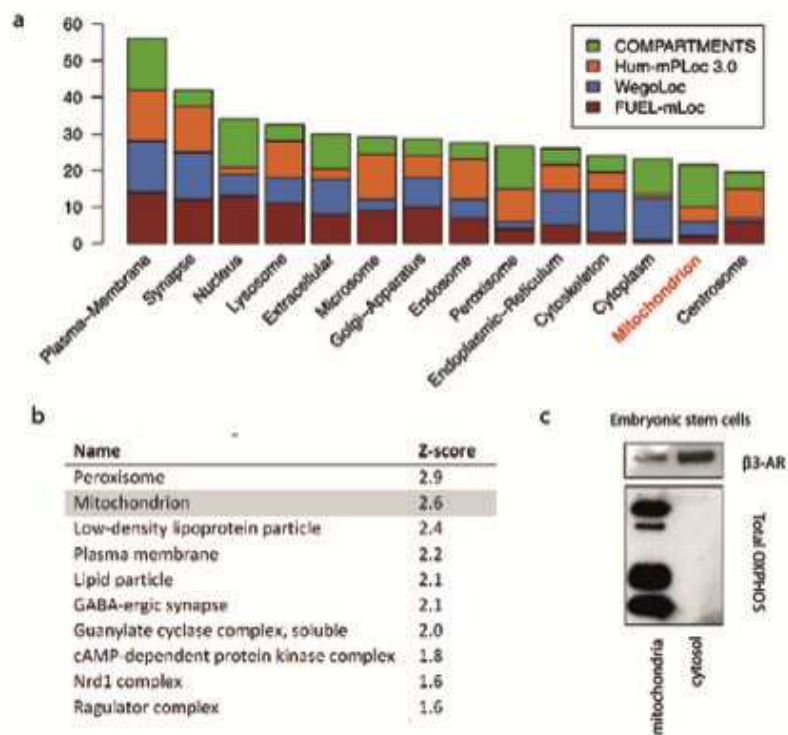

### Supplementary Figure 3

Bioinformatic analysis of the  $\beta 3$ -AR presence prediction in different cell compartments by database (a) and Z-score by Text-Mining (b). WB analysis of  $\beta 3$ AR expèssion in the mitochondria of ESC (c). Data represent at least three experiments (mean and SD).
